# Supplementary material for: A ratiometric fluorescent biosensor for the sensitive determination of α-glucosidase activity and acarbose based on N-doped carbon dots
Source: Royal Society of Chemistry journal article supplement (doi:10.1039/d0an01065k), 2020-01-01
Supplement: d0an01065k1.pdf [file d0an01065k1.pdf]

## Supporting Information

### **A ratiometric fluorescent biosensor for sensitive determination of $\alpha$ -glucosidase activity and acarbose based on N-doped carbon dots**

Mengjun Wang, Mengke Wang, Feng Zhang, Xingguang Su\*

*College of Chemistry, Jilin University, Changchun, 130012, PR China*

\*Corresponding author

Tel.: +86-431-85168352

E-mail address: [suxg@jlu.edu.cn](mailto:suxg@jlu.edu.cn) (X. Su).

## 1 Reagents

2       Acarbose Hydrate, Adenosine (A), Branched polyethyleneimine (PEI, molecular weight =  
3 10000) and Protamine (pro) were supplied by Shanghai Aladdin biochemical Co. Ltd.  $\alpha$ -  
4 Glucosidase was purchased from Sigma Reagents Company.  $\alpha$ -Arbutin was purchased from  
5 Shanghai Macklin Biochemical Technology Co., Ltd. Hydroquinone, reduced L-glutathione  
6 (GSH), trypsin (Try), hyaluronidase (HAase), bovine serum albumin (BSA), hemoglobin (Hb),  
7 urease (Urea), lysozyme (Lys) and Human serum albumin (HSA) were ordered from Sangon  
8 Biotech (Shanghai) Co. Ltd.  $\text{NaH}_2\text{PO}_4$ ,  $\text{Na}_2\text{HPO}_4$  and pepsin (pep) were obtained from Sino-  
9 pharm Co. (Shanghai, China). Phosphate buffer saline (PBS, 100 mmol  $\text{L}^{-1}$ ) were prepared with  
10 different volume ratio of 400 mmol  $\text{L}^{-1}$   $\text{NaH}_2\text{PO}_4$  and 400 mmol  $\text{L}^{-1}$   $\text{Na}_2\text{HPO}_4$ . Ultrapure water  
11 with good resistivity ( $\rho \geq 18 \text{ M}\Omega \text{ cm}^{-1}$ ) throughout this experiment was used. The pH values were  
12 recorded by PHS-3C (Hangzhou, China). All chemicals are obtained from formal chemical  
13 suppliers and can be used directly without any further purification.

## 14 Instruments

15       The ultraviolet-visible (UV-vis) absorption spectra, Photoluminescence (PL) spectra and  
16 Fourier transform infrared (FT-IR) spectra were obtained by a Varian GBC Cintra 10e UV-vis  
17 Spectrophotometer (Shimadzu Co., Ltd. Japan), RF-5301 fluorescence spectrophotometer and  
18 Thermo Nicolet 360 FTIR spectrometer, respectively. Transmission electron microscope (TEM)  
19 was carried on JEM-2100F. Fluorescence lifetime data was obtained on Edinburgh FLS920.

20

21

22

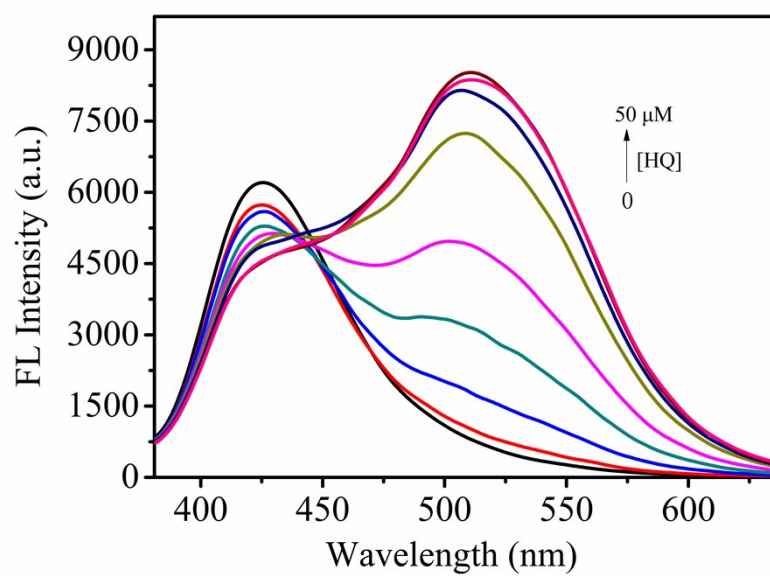

1  
2 **Fig. S1** Fluorescence emission spectra of the N-CDs/P<sub>HQ</sub>-PEI system with various concentrations of  
3 hydroquinone from 0 to 50 μM (0, 0.5, 2, 5, 10, 20, 30, 40, 50 μM).

4  
5  
6  
7  
8  
9  
10  
11

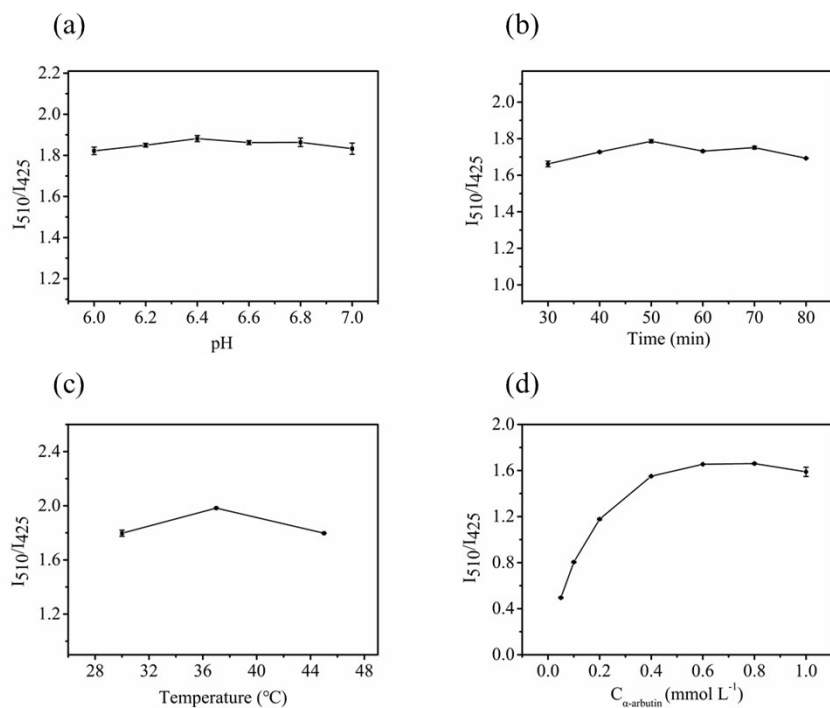

1

2 **Fig. S2** (a) Effect of enzyme pH on  $I_{510}/I_{425}$ . (b) Effect of enzyme reaction time between  $\alpha$ -

3 glucosidase and  $\alpha$ -arbutin. (c) Effect of enzyme temperature on  $I_{510}/I_{425}$ . (d) Effect of the  $\alpha$ -arbutin

4 concentration on  $I_{510}/I_{425}$ .

5

6

7

8

9

10

11

12

13

14

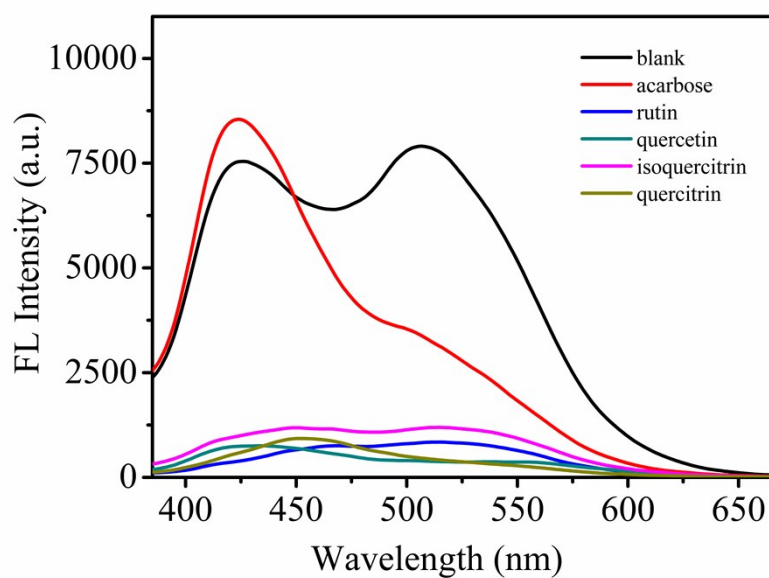

1  
2 **Fig. S3** (a) Fluorescent intensity ratio ( $I_{510}/I_{425}$ ) response to different inhibitors: acarbose, rutin,  
3 quercetin, quercitrin and isoquercitrin ( $160 \mu\text{mol mL}^{-1}$ ).

**Table S1** Comparison of our method with other methods for the determination of  $\alpha$ -glucosidase

| Detection methods        | Materials                                  | Linear range<br>(U mL <sup>-1</sup> ) | LOD<br>(U mL <sup>-1</sup> ) | References |
|--------------------------|--------------------------------------------|---------------------------------------|------------------------------|------------|
| Ratiometric fluorescence | Dual-color carbon dots                     | 0.13-6.70                             | 0.036                        | [1]        |
| Ratiometric fluorescence | Ag nanoclusters/MnO <sub>2</sub> nanosheet | 0.2-8.0                               | 0.03                         | [2]        |
| Electrochemistry         | Pyrene boric acid                          | 0-1.1                                 | 0.04                         | [3]        |
| Electrochemistry         | Gold nanoparticle-modified gold electrode  | 0.1-1.1                               | 0.04                         | [4]        |
| Colorimetry              | Gold nanorods                              | 0.0025-0.045                          | 0.0005                       | [5]        |
| Fluorescence             | Cationic Conjugated Polymers               | 0.1-0.5                               | 0.01                         | [6]        |
| Ratiometric fluorescence | N-CDs/P <sub>HQ</sub> -PEI                 | 0.0002-0.0016                         | 8.2×10 <sup>-5</sup>         | This work  |

## 1 References:

- 2 1. X. Cheng, J. Xu, L. Wang, G. Xu, F. Wei, Y. Chai, Q. Hu and Y. Cen, *Microchimica*  
3 *Acta*, 2019, **186**, 818.
- 4 2. M. Shi, Y. Cen, G. Xu, F. Wei, X. Xu, X. Cheng, Y. Chai, M. Sohail and Q. Hu, *Anal*  
5 *Chim Acta*, 2019, **1077**, 225-231.
- 6 3. J. Zhang, Y. Liu, X. Wang, Y. Chen and G. Li, *Biosens Bioelectron*, 2015, **74**, 666-672.
- 7 4. J. Zhang, Y. Liu, J. Lv, Y. Cao and G. Li, *Microchimica Acta*, 2014, **182**, 281-288.
- 8 5. X. Cheng, Y. Huang, C. Yuan, K. Dai, H. Jiang and J. Ma, *Sensors and Actuators B:*  
9 *Chemical*, 2019, **282**, 838-843.
- 10 6. A. Cao, Y. Tang and Y. Liu, *ACS Appl Mater Interfaces*, 2012, **4**, 3773-3778.

11
